# Supplementary material for: Mouse Syngeneic Melanoma Model with Human Epidermal Growth Factor Receptor Expression
Source: MDPI journal article supplement (doi:10.3390/pharmaceutics14112448), 2022-11-12
Supplement: s1 [file s1]

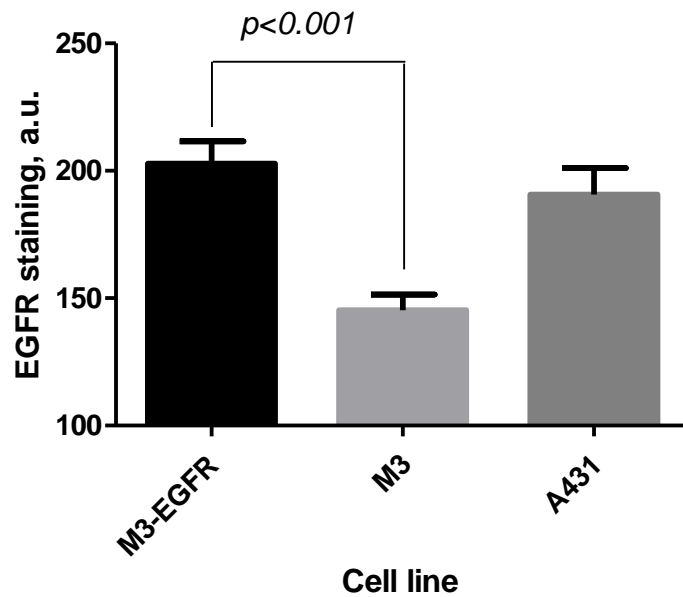

Figure S1. Semi-quantification of epidermal growth factor receptor (EGFR) expression in M3-EGFR, parental M3 and A431 cell lines. EGFR was detected by immunocytochemistry in fixed cells using horseradish peroxidase-conjugated anti-EGFR antibodies (see Materials and Methods section in the main text). One-way analysis of variance (ANOVA) with Tukey's multiple comparisons test was carried out to test for significant differences between the means. Data are presented as means  $\pm$  standard error of mean ( $n=10-12$ ); a.u. – arbitrary units.

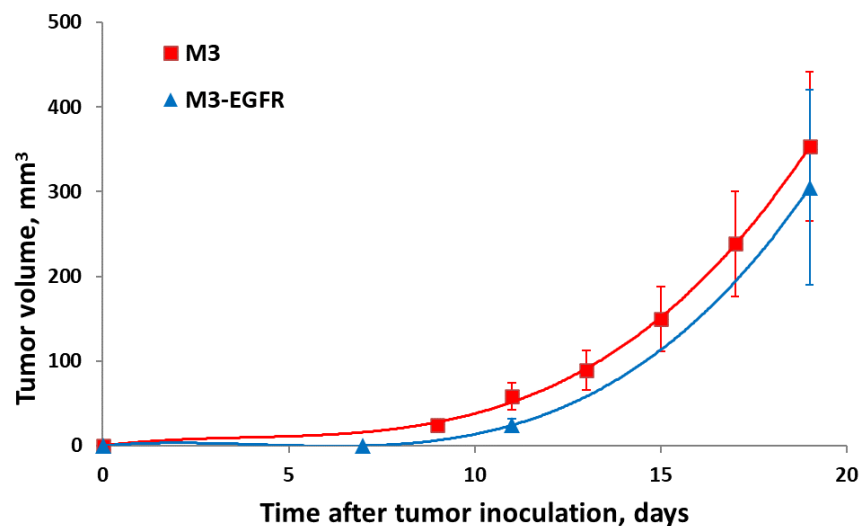

Figure S2. Tumor growth curves of M3-EGFR and parental M3 tumors in DBA/2 mice after subcutaneous inoculation of 2 million cells. Data are presented as means  $\pm$  standard error of mean ( $n=7-19$ )

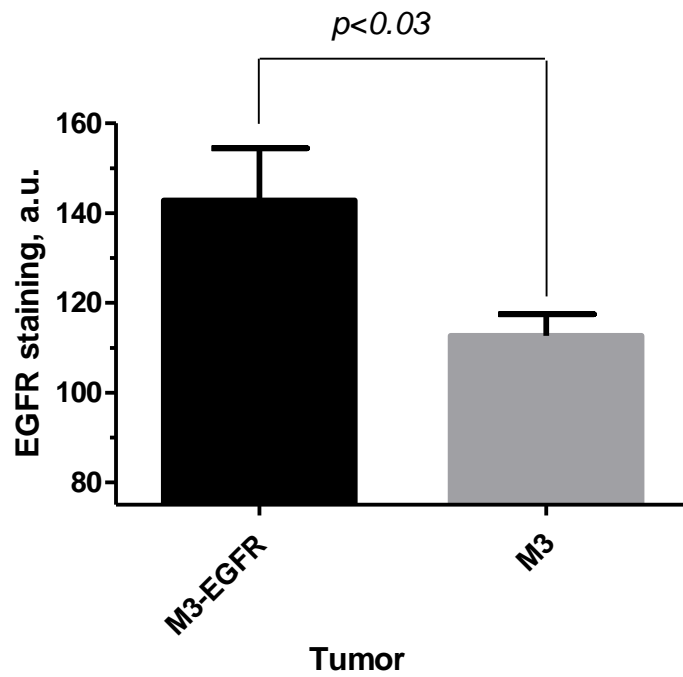

Figure S3. Semi-quantification of epidermal growth factor receptor (EGFR) expression in M3-EGFR and parental M3 tumors. EGFR was detected by immunohistochemistry in fixed tissue sections using horseradish peroxidase-conjugated anti-EGFR antibodies (see Materials and Methods section in the main text). Student t-test was carried out to test for significant differences between the means. Data are presented as means  $\pm$  standard error of mean ( $n=10$ ); a.u. – arbitrary units.
